# Supplementary material
Source: PubMed Central journal article supplement (PMC6728525)
Supplement: mmc1.pdf [file mmc1.pdf]

**Title:** Cost Effectiveness of Sorafenib for Treatment of Advanced Hepatocellular Carcinoma in India

**Journal name:** Journal of Clinical and Experimental Hepatology

**Author names:** Nidhi Gupta<sup>1</sup>, MD, Rohan Kumar Verma<sup>2</sup>, MSc, Shankar Prinja<sup>2</sup>, MD, Radha Krishan Dhiman<sup>3</sup>, DM

1. Department of Radiation Oncology, Grecian Super-speciality Hospital, Mohali, India.
2. School of Public Health, Post Graduate Institute of Medical Education and Research, Chandigarh, India.
3. Department of Hepatology, Post Graduate Institute of Medical Education and Research, Chandigarh, India.

**E-mail address of the corresponding author:** shankarprinja@gmail.com

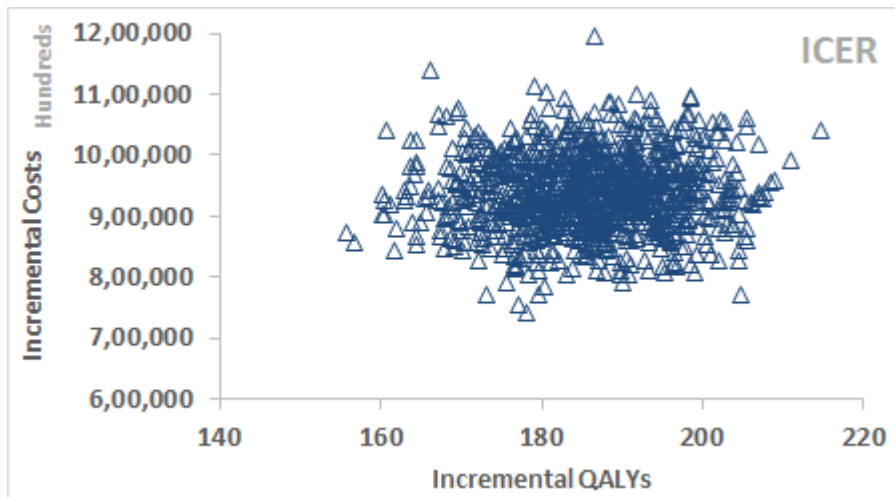

Supplementary Figure 1 Incremental Cost Effectiveness Ratio Plot

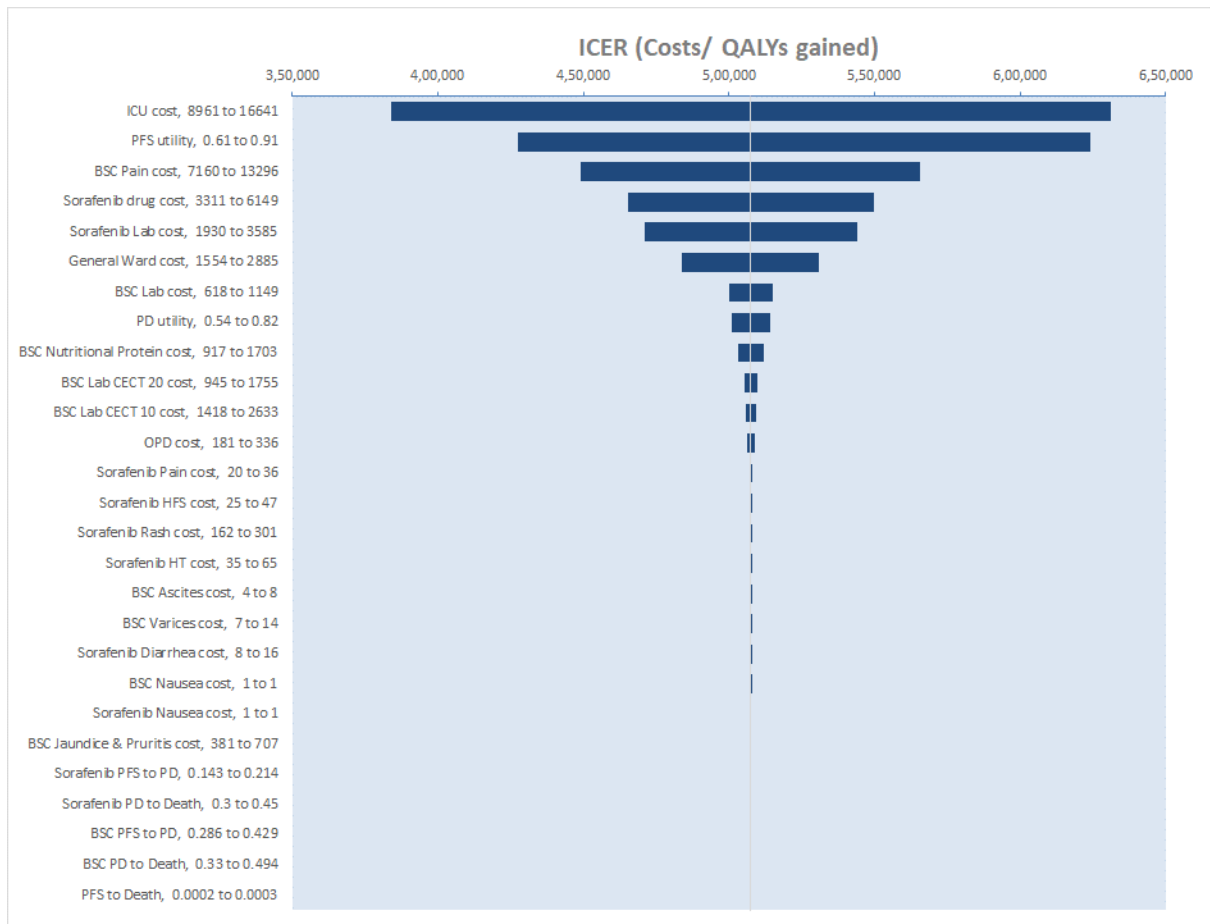

Supplementary Figure 2 Univariate sensitivity chart

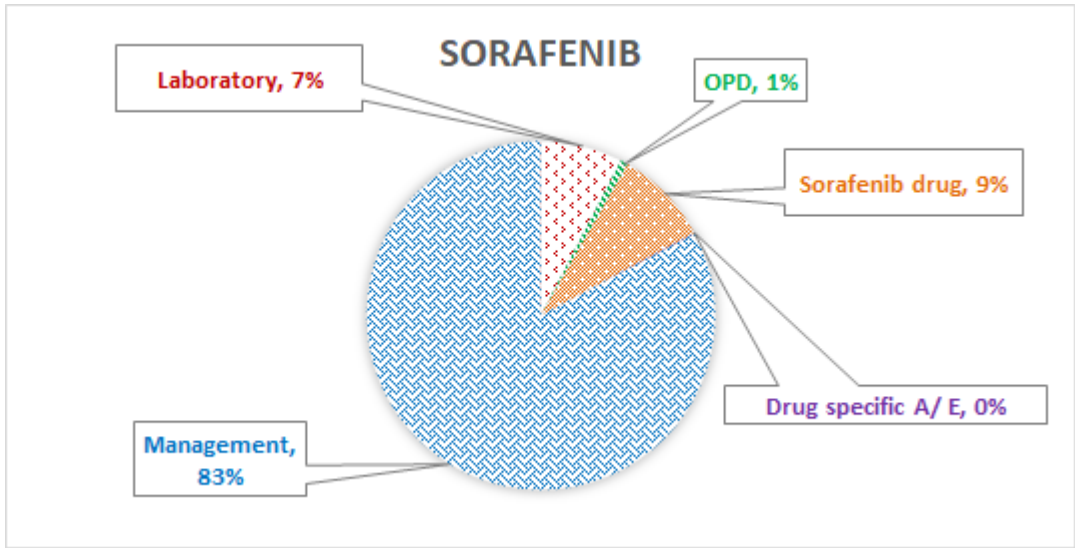

Supplementary Figure 3 Cost determinants in Sorafenib arm

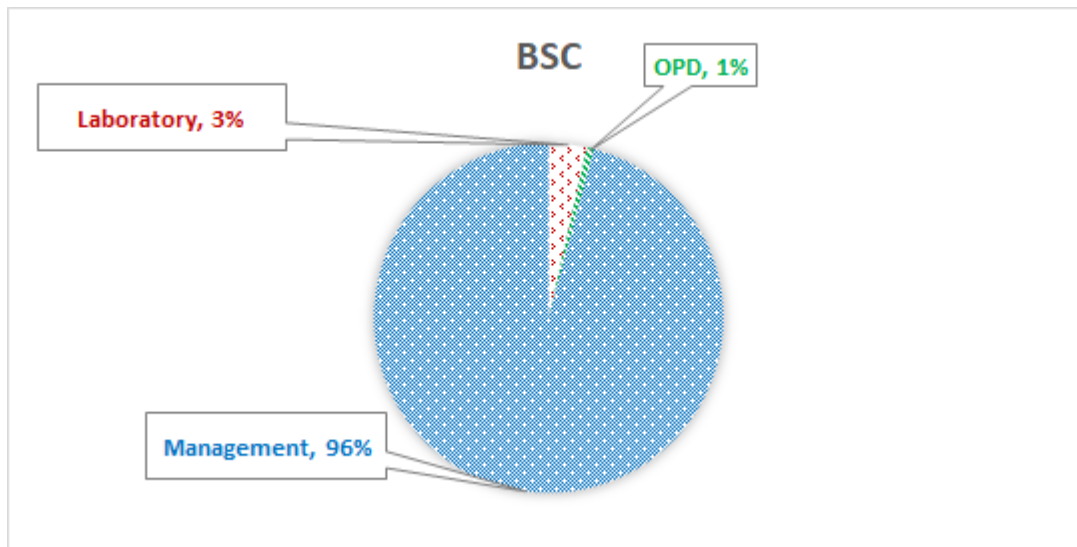

Supplementary Figure 4 Cost determinants in BSC arm
